# Supplementary material
Source: MDPI journal article supplement (https://www.mdpi.com/search?q=viruses-11-00014)
Supplement: s001 [file viruses-11-00014-s001.pdf]

**Table S1.** Site-level pseudorabies virus (PrV) antibody detection probability ( $\hat{p}$ ), corrected probability of occurrence ( $Psi_{cond}$ ), sample size, and apparent seroprevalence for 15 wild pig sites with dog hunting and 68 sites with no hunting, 2007-2014 (Florida, U.S.A.).

| Site | Policy | Year |      |      |      |      |      |      |      | $\hat{p}$ | $Psi_{cond}$ | Sample size | Apparent seroprevalence |
|------|--------|------|------|------|------|------|------|------|------|-----------|--------------|-------------|-------------------------|
|      |        | 2007 | 2008 | 2009 | 2010 | 2011 | 2012 | 2013 | 2014 |           |              |             |                         |
| 1    | Hunt   | .    | .    | 1    | 1    | 1    | 1    | .    | 1    | 0.96      | 1.00         | 89          | 0.70                    |
| 2    | Hunt   | .    | .    | .    | .    | .    | .    | .    | 1    | 0.96      | 1.00         | 1           | 1.00                    |
| 3    | Hunt   | .    | .    | .    | .    | 0    | .    | 0    | .    | 0.96      | 0.02         | 6           | 0.00                    |
| 4    | Hunt   | .    | .    | .    | .    | .    | 1    | 1    | .    | 0.96      | 1.00         | 19          | 0.68                    |
| 5    | Hunt   | .    | .    | .    | .    | .    | 1    | .    | .    | 0.96      | 1.00         | 1           | 1.00                    |
| 6    | Hunt   | 1    | 1    | 1    | 1    | 1    | 1    | 1    | 1    | 0.96      | 1.00         | 297         | 0.29                    |
| 7    | Hunt   | .    | .    | .    | .    | 1    | .    | .    | 1    | 0.96      | 1.00         | 36          | 0.44                    |
| 8    | Hunt   | .    | .    | 1    | 1    | 1    | 1    | 1    | 1    | 0.96      | 1.00         | 116         | 0.53                    |
| 9    | Hunt   | .    | .    | .    | 1    | 0    | 1    | 1    | 1    | 0.96      | 1.00         | 23          | 0.48                    |
| 10   | Hunt   | .    | 1    | .    | 1    | .    | .    | .    | 1    | 0.96      | 1.00         | 21          | 0.48                    |
| 11   | Hunt   | .    | .    | .    | .    | .    | .    | .    | 1    | 0.96      | 1.00         | 29          | 0.45                    |
| 12   | Hunt   | .    | .    | .    | 1    | 1    | 1    | 1    | 1    | 0.96      | 1.00         | 102         | 0.57                    |
| 13   | Hunt   | .    | .    | 1    | 1    | 1    | 1    | .    | 1    | 0.96      | 1.00         | 86          | 0.52                    |
| 14   | Hunt   | .    | .    | .    | .    | 0    | 1    | 1    | 1    | 0.96      | 1.00         | 41          | 0.66                    |
| 15   | Hunt   | .    | .    | .    | 1    | 1    | 1    | 1    | 1    | 0.96      | 1.00         | 28          | 0.79                    |
| 16   | No     | .    | .    | .    | .    | .    | .    | 1    | 1    | 0.72      | 1.00         | 18          | 0.22                    |
| 17   | No     | .    | 0    | .    | .    | .    | .    | .    | .    | 0.72      | 0.46         | 2           | 0.00                    |
| 18   | No     | .    | .    | .    | .    | .    | 1    | 1    | 1    | 0.72      | 1.00         | 48          | 0.69                    |
| 19   | No     | .    | 1    | 1    | .    | .    | 1    | .    | .    | 0.72      | 1.00         | 51          | 0.24                    |
| 20   | No     | 0    | 1    | .    | .    | .    | .    | .    | .    | 0.72      | 1.00         | 26          | 0.04                    |
| 21   | No     | .    | .    | .    | .    | .    | 0    | 1    | .    | 0.72      | 1.00         | 15          | 0.33                    |
| 22   | No     | .    | .    | .    | .    | 1    | .    | .    | .    | 0.72      | 1.00         | 14          | 0.07                    |
| 23   | No     | .    | 0    | .    | .    | .    | .    | .    | .    | 0.72      | 0.46         | 4           | 0.00                    |
| 24   | No     | .    | .    | .    | .    | 1    | 0    | .    | .    | 0.72      | 1.00         | 10          | 0.10                    |
| 25   | No     | .    | 1    | 1    | 1    | .    | .    | 0    | .    | 0.72      | 1.00         | 80          | 0.34                    |
| 26   | No     | 1    | 1    | 1    | 1    | 1    | .    | .    | 1    | 0.72      | 1.00         | 48          | 0.54                    |

|    |    |   |   |   |   |   |   |   |   |      |      |    |      |
|----|----|---|---|---|---|---|---|---|---|------|------|----|------|
| 27 | No | . | . | . | . | 0 | 0 | . | . | 0.72 | 0.19 | 12 | 0.00 |
| 28 | No | . | . | 1 | 1 | . | . | . | . | 0.72 | 1.00 | 9  | 0.78 |
| 29 | No | . | 1 | . | 1 | 1 | . | . | . | 0.72 | 1.00 | 42 | 0.31 |
| 30 | No | 1 | 0 | . | . | 1 | . | . | . | 0.72 | 1.00 | 33 | 0.45 |
| 31 | No | . | . | 0 | . | . | 0 | . | 0 | 0.72 | 0.06 | 33 | 0.00 |
| 32 | No | . | . | . | . | . | 1 | 1 | 1 | 0.72 | 1.00 | 21 | 0.67 |
| 33 | No | 0 | . | . | . | . | . | . | . | 0.72 | 0.46 | 1  | 0.00 |
| 34 | No | . | . | . | . | . | . | 0 | . | 0.72 | 0.46 | 5  | 0.00 |
| 35 | No | . | . | . | . | . | 0 | . | . | 0.72 | 0.46 | 5  | 0.00 |
| 36 | No | . | 0 | . | . | . | . | . | . | 0.72 | 0.46 | 4  | 0.00 |
| 37 | No | . | . | 1 | . | . | . | . | . | 0.72 | 1.00 | 7  | 0.29 |
| 38 | No | . | . | . | . | . | . | 0 | . | 0.72 | 0.46 | 3  | 0.00 |
| 39 | No | 0 | 0 | . | . | . | . | . | . | 0.72 | 0.19 | 6  | 0.00 |
| 40 | No | . | . | . | . | . | . | 1 | 0 | 0.72 | 1.00 | 9  | 0.11 |
| 41 | No | 0 | 0 | . | . | . | . | . | . | 0.72 | 0.19 | 11 | 0.00 |
| 42 | No | . | . | . | . | . | . | . | 0 | 0.72 | 0.46 | 1  | 0.00 |
| 43 | No | 0 | 0 | . | . | . | . | . | 1 | 0.72 | 1.00 | 13 | 0.15 |
| 44 | No | . | . | . | . | . | . | 1 | . | 0.72 | 1.00 | 1  | 1.00 |
| 45 | No | . | . | . | 0 | 1 | . | . | . | 0.72 | 1.00 | 23 | 0.09 |
| 46 | No | . | . | . | . | 0 | . | . | . | 0.72 | 0.46 | 1  | 0.00 |
| 47 | No | . | . | . | . | . | . | . | 0 | 0.72 | 0.46 | 3  | 0.00 |
| 48 | No | . | . | . | 0 | . | 0 | . | 0 | 0.72 | 0.06 | 20 | 0.00 |
| 49 | No | . | . | . | . | 0 | . | . | . | 0.72 | 0.46 | 6  | 0.00 |
| 50 | No | . | . | . | . | . | 1 | . | . | 0.72 | 1.00 | 3  | 0.33 |
| 51 | No | . | 0 | . | . | . | . | . | . | 0.72 | 0.46 | 1  | 0.00 |
| 52 | No | . | . | . | . | 0 | . | . | . | 0.72 | 0.46 | 33 | 0.00 |
| 53 | No | . | . | . | . | . | . | . | 0 | 0.72 | 0.46 | 10 | 0.00 |
| 54 | No | 1 | . | 0 | . | . | . | . | . | 0.72 | 1.00 | 8  | 0.25 |
| 55 | No | 1 | 0 | . | 1 | 1 | . | 1 | 1 | 0.72 | 1.00 | 84 | 0.54 |
| 56 | No | 1 | . | . | . | . | . | . | . | 0.72 | 1.00 | 5  | 0.40 |
| 57 | No | . | . | 1 | 1 | 1 | . | . | . | 0.72 | 1.00 | 58 | 0.71 |
| 58 | No | . | . | . | . | . | . | . | 1 | 0.72 | 1.00 | 13 | 0.38 |

|               |    |   |   |   |   |   |   |   |      |      |      |      |
|---------------|----|---|---|---|---|---|---|---|------|------|------|------|
| 59            | No | . | . | . | . | . | . | 1 | 0.72 | 1.00 | 6    | 0.33 |
| 60            | No | . | . | . | 0 | . | . | . | 0.72 | 0.46 | 3    | 0.00 |
| 61            | No | . | . | . | . | 0 | . | . | 0.72 | 0.46 | 8    | 0.00 |
| 62            | No | 1 | . | . | 1 | 1 | . | 1 | 0.72 | 1.00 | 42   | 0.67 |
| 63            | No | . | 1 | . | . | 1 | . | . | 0.72 | 1.00 | 12   | 0.25 |
| 64            | No | 0 | . | . | . | . | . | . | 0.72 | 0.46 | 2    | 0.00 |
| 65            | No | 0 | . | . | . | . | . | . | 0.72 | 0.46 | 1    | 0.00 |
| 66            | No | . | . | . | . | . | 1 | 0 | 0.72 | 1.00 | 16   | 0.13 |
| 67            | No | . | . | . | . | 1 | . | . | 0.72 | 1.00 | 1    | 1.00 |
| 68            | No | 0 | . | 1 | . | . | . | . | 0.72 | 1.00 | 2    | 0.50 |
| 69            | No | . | 0 | . | . | . | . | . | 0.72 | 0.46 | 22   | 0.00 |
| 70            | No | . | . | . | 0 | 0 | . | . | 0.72 | 0.19 | 6    | 0.00 |
| 71            | No | 1 | . | 1 | 1 | 1 | 1 | . | 0.72 | 1.00 | 57   | 0.28 |
| 72            | No | . | . | 0 | 1 | 0 | . | . | 0.72 | 1.00 | 10   | 0.10 |
| 73            | No | . | . | 0 | . | . | . | . | 0.72 | 0.46 | 19   | 0.00 |
| 74            | No | . | . | 1 | . | . | . | . | 0.72 | 1.00 | 4    | 0.25 |
| 75            | No | 1 | . | . | . | . | . | . | 0.72 | 1.00 | 1    | 1.00 |
| 76            | No | 1 | 1 | . | . | . | . | 1 | 0.72 | 1.00 | 16   | 0.75 |
| 77            | No | . | . | . | . | 1 | 1 | 1 | 0.72 | 1.00 | 10   | 0.80 |
| 78            | No | . | . | . | . | . | . | 1 | 0.72 | 1.00 | 1    | 1.00 |
| 79            | No | 0 | . | . | . | . | . | . | 0.72 | 0.46 | 10   | 0.00 |
| 80            | No | . | 0 | . | . | . | . | 1 | 0.72 | 1.00 | 21   | 0.05 |
| 81            | No | . | 1 | . | . | . | . | . | 0.72 | 1.00 | 9    | 0.22 |
| 82            | No | . | . | . | . | . | . | 0 | 0.72 | 0.46 | 2    | 0.00 |
| 83            | No | . | 1 | 0 | . | . | . | . | 0.72 | 1.00 | 15   | 0.40 |
| Hunt total    |    |   |   |   |   |   |   |   | 0.96 | 0.93 | 895  | 0.48 |
| No hunt total |    |   |   |   |   |   |   |   | 0.72 | 0.75 | 1096 | 0.32 |
| Grand total   |    |   |   |   |   |   |   |   | 0.81 | 0.75 | 1991 | 0.39 |

**Table S2.** Site-level *Brucella* spp. antibody detection probability ( $\hat{p}$ ), corrected probability of occurrence ( $Psi_{cond}$ ), sample size, and apparent seroprevalence for 15 wild pig sites with dog hunting and 68 sites with no hunting, 2007-2014 (Florida, U.S.A.).

| Site | Policy | Year |      |      |      |      |      |      |      | $\hat{p}$ | $Psi_{cond}$ | Sample size | Apparent seroprevalence |
|------|--------|------|------|------|------|------|------|------|------|-----------|--------------|-------------|-------------------------|
|      |        | 2007 | 2008 | 2009 | 2010 | 2011 | 2012 | 2013 | 2014 |           |              |             |                         |
| 1    | Hunt   | .    | .    | 1    | 1    | 0    | 1    | .    | 1    | 0.73      | 1.00         | 89          | 0.18                    |
| 2    | Hunt   | .    | .    | .    | .    | .    | .    | .    | 0    | 0.73      | 0.63         | 1           | 0.00                    |
| 3    | Hunt   | .    | .    | .    | .    | 0    | .    | 0    | .    | 0.73      | 0.32         | 6           | 0.00                    |
| 4    | Hunt   | .    | .    | .    | .    | .    | 1    | 1    | .    | 0.73      | 1.00         | 19          | 0.37                    |
| 5    | Hunt   | .    | .    | .    | .    | .    | 1    | .    | .    | 0.73      | 1.00         | 1           | 1.00                    |
| 6    | Hunt   | 0    | 0    | 0    | 0    | 0    | 0    | 0    | 0    | 0.73      | 0.00         | 297         | 0.00                    |
| 7    | Hunt   | .    | .    | .    | .    | 1    | .    | .    | 1    | 0.73      | 1.00         | 36          | 0.31                    |
| 8    | Hunt   | .    | .    | 1    | 1    | 1    | 1    | 1    | 1    | 0.73      | 1.00         | 116         | 0.24                    |
| 9    | Hunt   | .    | .    | .    | 0    | 0    | 1    | 0    | 1    | 0.73      | 1.00         | 23          | 0.26                    |
| 10   | Hunt   | .    | 0    | .    | 1    | .    | .    | .    | 0    | 0.73      | 1.00         | 21          | 0.05                    |
| 11   | Hunt   | .    | .    | .    | .    | .    | .    | .    | 1    | 0.73      | 1.00         | 29          | 0.34                    |
| 12   | Hunt   | .    | .    | .    | 0    | 1    | 0    | 1    | 1    | 0.73      | 1.00         | 102         | 0.25                    |
| 13   | Hunt   | .    | .    | 1    | 0    | 1    | 1    | .    | 1    | 0.73      | 1.00         | 86          | 0.17                    |
| 14   | Hunt   | .    | .    | .    | .    | 0    | 1    | 1    | 1    | 0.73      | 1.00         | 41          | 0.29                    |
| 15   | Hunt   | .    | .    | .    | 0    | 1    | 1    | 1    | 1    | 0.73      | 1.00         | 28          | 0.36                    |
| 16   | No     | .    | .    | .    | .    | .    | .    | 1    | 1    | 0.56      | 1.00         | 18          | 0.33                    |
| 17   | No     | .    | 0    | .    | .    | .    | .    | .    | .    | 0.56      | 0.38         | 2           | 0.00                    |
| 18   | No     | .    | .    | .    | .    | .    | 1    | 1    | 1    | 0.56      | 1.00         | 48          | 0.15                    |
| 19   | No     | .    | 0    | 0    | .    | .    | 0    | .    | .    | 0.56      | 0.10         | 51          | 0.00                    |
| 20   | No     | 0    | 1    | .    | .    | .    | .    | .    | .    | 0.56      | 1.00         | 26          | 0.15                    |
| 21   | No     | .    | .    | .    | .    | .    | 1    | 0    | .    | 0.56      | 1.00         | 15          | 0.13                    |
| 22   | No     | .    | .    | .    | .    | 0    | .    | .    | .    | 0.56      | 0.38         | 14          | 0.00                    |
| 23   | No     | .    | 0    | .    | .    | .    | .    | .    | .    | 0.56      | 0.38         | 4           | 0.00                    |
| 24   | No     | .    | .    | .    | .    | 0    | 0    | .    | .    | 0.56      | 0.21         | 10          | 0.00                    |
| 25   | No     | .    | 1    | 1    | 1    | .    | .    | 1    | .    | 0.56      | 1.00         | 80          | 0.13                    |
| 26   | No     | 1    | 1    | 1    | 0    | 1    | .    | .    | 0    | 0.56      | 1.00         | 48          | 0.25                    |
| 27   | No     | .    | .    | .    | .    | 0    | 0    | .    | .    | 0.56      | 0.21         | 12          | 0.00                    |

|    |    |   |   |   |   |   |   |   |   |      |      |    |      |
|----|----|---|---|---|---|---|---|---|---|------|------|----|------|
| 28 | No | . | . | 1 | 0 | . | . | . | . | 0.56 | 1.00 | 9  | 0.22 |
| 29 | No | . | 0 | . | 0 | 0 | . | . | . | 0.56 | 0.10 | 42 | 0.00 |
| 30 | No | 0 | 0 | . | . | 0 | . | . | . | 0.56 | 0.10 | 33 | 0.00 |
| 31 | No | . | . | 0 | . | . | 0 | . | 0 | 0.56 | 0.10 | 33 | 0.00 |
| 32 | No | . | . | . | . | . | 0 | 1 | 0 | 0.56 | 1.00 | 21 | 0.19 |
| 33 | No | 0 | . | . | . | . | . | . | . | 0.56 | 0.38 | 1  | 0.00 |
| 34 | No | . | . | . | . | . | . | 0 | . | 0.56 | 0.38 | 5  | 0.00 |
| 35 | No | . | . | . | . | . | 0 | . | . | 0.56 | 0.38 | 5  | 0.00 |
| 36 | No | . | 0 | . | . | . | . | . | . | 0.56 | 0.38 | 4  | 0.00 |
| 37 | No | . | . | 1 | . | . | . | . | . | 0.56 | 1.00 | 7  | 0.29 |
| 38 | No | . | . | . | . | . | . | 1 | . | 0.56 | 1.00 | 3  | 0.67 |
| 39 | No | 0 | 0 | . | . | . | . | . | . | 0.56 | 0.21 | 6  | 0.00 |
| 40 | No | . | . | . | . | . | . | 0 | 1 | 0.56 | 1.00 | 9  | 0.22 |
| 41 | No | 1 | 0 | . | . | . | . | . | . | 0.56 | 1.00 | 11 | 0.09 |
| 42 | No | . | . | . | . | . | . | . | 0 | 0.56 | 0.38 | 1  | 0.00 |
| 43 | No | 1 | 1 | . | . | . | . | . | 0 | 0.56 | 1.00 | 13 | 0.15 |
| 44 | No | . | . | . | . | . | . | 1 | . | 0.56 | 1.00 | 1  | 1.00 |
| 45 | No | . | . | . | 0 | 0 | . | . | . | 0.56 | 0.21 | 23 | 0.00 |
| 46 | No | . | . | . | . | 0 | . | . | . | 0.56 | 0.38 | 1  | 0.00 |
| 47 | No | . | . | . | . | . | . | . | 0 | 0.56 | 0.38 | 3  | 0.00 |
| 48 | No | . | . | . | 1 | . | 0 | . | 0 | 0.56 | 1.00 | 20 | 0.05 |
| 49 | No | . | . | . | . | 1 | . | . | . | 0.56 | 1.00 | 6  | 0.17 |
| 50 | No | . | . | . | . | . | 1 | . | . | 0.56 | 1.00 | 3  | 0.67 |
| 51 | No | . | 0 | . | . | . | . | . | . | 0.56 | 0.38 | 1  | 0.00 |
| 52 | No | . | . | . | . | 0 | . | . | . | 0.56 | 0.38 | 33 | 0.00 |
| 53 | No | . | . | . | . | . | . | . | 0 | 0.56 | 0.38 | 10 | 0.00 |
| 54 | No | 1 | . | 0 | . | . | . | . | . | 0.56 | 1.00 | 8  | 0.13 |
| 55 | No | 1 | 0 | . | 1 | 0 | . | 1 | 1 | 0.56 | 1.00 | 84 | 0.23 |
| 56 | No | 1 | . | . | . | . | . | . | . | 0.56 | 1.00 | 5  | 0.20 |
| 57 | No | . | . | 1 | 1 | 0 | . | . | . | 0.56 | 1.00 | 58 | 0.10 |
| 58 | No | . | . | . | . | . | . | . | 1 | 0.56 | 1.00 | 13 | 0.31 |
| 59 | No | . | . | . | . | . | . | . | 0 | 0.56 | 0.38 | 6  | 0.00 |

|               |    |   |   |   |   |   |   |   |   |      |      |      |      |
|---------------|----|---|---|---|---|---|---|---|---|------|------|------|------|
| 60            | No | . | . | . | 0 | . | . | . | . | 0.56 | 0.38 | 3    | 0.00 |
| 61            | No | . | . | . | . | 0 | . | . | . | 0.56 | 0.38 | 8    | 0.00 |
| 62            | No | 0 | . | . | 0 | 1 | . | 1 | . | 0.56 | 1.00 | 42   | 0.14 |
| 63            | No | . | 1 | . | . | 0 | . | . | . | 0.56 | 1.00 | 12   | 0.08 |
| 64            | No | 1 | . | . | . | . | . | . | . | 0.56 | 1.00 | 2    | 0.50 |
| 65            | No | 0 | . | . | . | . | . | . | . | 0.56 | 0.38 | 1    | 0.00 |
| 66            | No | . | . | . | . | . | 1 | 1 | . | 0.56 | 1.00 | 16   | 0.31 |
| 67            | No | . | . | . | . | 0 | . | . | . | 0.56 | 0.38 | 1    | 0.00 |
| 68            | No | 0 | . | 0 | . | . | . | . | . | 0.56 | 0.21 | 2    | 0.00 |
| 69            | No | . | 0 | . | . | . | . | . | . | 0.56 | 0.38 | 22   | 0.00 |
| 70            | No | . | . | . | 0 | 0 | . | . | . | 0.56 | 0.21 | 6    | 0.00 |
| 71            | No | 0 | . | 0 | 0 | 0 | 0 | . | . | 0.56 | 0.02 | 57   | 0.00 |
| 72            | No | . | . | 0 | 0 | 0 | . | . | . | 0.56 | 0.10 | 10   | 0.00 |
| 73            | No | . | . | 0 | . | . | . | . | . | 0.56 | 0.38 | 19   | 0.00 |
| 74            | No | . | . | 0 | . | . | . | . | . | 0.56 | 0.38 | 4    | 0.00 |
| 75            | No | 0 | . | . | . | . | . | . | . | 0.56 | 0.38 | 1    | 0.00 |
| 76            | No | 1 | 0 | . | . | . | . | 1 | . | 0.56 | 1.00 | 16   | 0.25 |
| 77            | No | . | . | . | . | 0 | 0 | 0 | . | 0.56 | 0.10 | 10   | 0.00 |
| 78            | No | . | . | . | . | . | . | 0 | . | 0.56 | 0.38 | 1    | 0.00 |
| 79            | No | 1 | . | . | . | . | . | . | . | 0.56 | 1.00 | 10   | 0.20 |
| 80            | No | . | 0 | . | . | . | . | 0 | 0 | 0.56 | 0.10 | 21   | 0.00 |
| 81            | No | . | 0 | . | . | . | . | . | . | 0.56 | 0.38 | 9    | 0.00 |
| 82            | No | . | . | . | . | . | . | 0 | . | 0.56 | 0.38 | 2    | 0.00 |
| 83            | No | . | 0 | 0 | . | . | . | . | . | 0.56 | 0.21 | 15   | 0.00 |
| Hunt total    |    |   |   |   |   |   |   |   |   | 0.73 | 0.86 | 895  | 0.16 |
| No hunt total |    |   |   |   |   |   |   |   |   | 0.56 | 0.58 | 1096 | 0.10 |
| Grand total   |    |   |   |   |   |   |   |   |   | 0.63 | 0.63 | 1991 | 0.13 |
